# Supplementary material for: Stiff-Elongated Balance of PLA-Based Polymer Blends
Source: MDPI journal article supplement (doi:10.3390/polym13244279), 2021-12-07
Supplement: s1 [file s1]

# Stiff-Elongated Balance of PLA-Based Polymer Blends

Mónica Elvira Mendoza-Duarte <sup>1,2</sup>, Iván Alziri Estrada-Moreno <sup>3</sup>, Perla Elvia García-Casillas <sup>2,\*</sup>  
and Alejandro Vega-Ríos <sup>1,\*</sup>

<sup>1</sup> Centro de Investigación en Materiales Avanzados, S.C. Av. Miguel de Cervantes #120, Chihuahua 31136, Mexico; monica.mendoza@cimav.edu.mx

<sup>2</sup> Instituto de Ingeniería y Tecnología, Universidad Autónoma de Ciudad Juárez, Chihuahua 32310, Mexico

<sup>3</sup> CONACyT-CIMAV S.C., Av. Miguel de Cervantes #120, Chihuahua, Mexico; ivan.estrada@cimav.edu.mx

\* Correspondence: pegarcia@uacj.mx (P.E.G.-C.); alejandro.vega@cimav.edu.mx (A.V.-R.)

## 1. Results

### 1.1. Binary Blends

The design of experiments was done through MINITAB-17 software. For the formulation of the binary polymer blends, a full factorial experiment model 2<sup>k</sup> was applied. Three distinct factors, polymer, concentration, and mixing time were defined; see Table S1.

**Table S1.** Levels and factors considered in the factorial experiment model 2k.

| Factor | Description   | Polymer Blends with Elongation Capacity |                 | Stiff Polymer Blends |                 |
|--------|---------------|-----------------------------------------|-----------------|----------------------|-----------------|
|        |               | Low Level (-1)                          | High Level (+1) | Low Level (-1)       | High Level (+1) |
| A      | Polymer       | LDPE                                    | EVA             | PS                   | Poly(S-co-MMA)  |
| B      | Concentration | 1%                                      | 30%             | 1%                   | 30%             |
| C      | Mixing time   | 5 min                                   | 15 min          | 5 min                | 15 min          |

**Table S2.** Factorial regression for polymer blends with elongation capacity.

| Analysis of Variance |    |        |         |         |         |
|----------------------|----|--------|---------|---------|---------|
| Source               | DF | Adj SS | Adj MS  | F Value | p Value |
| Model                | 4  | 565.61 | 141.403 | 14.61   | 0.000   |
| Linear               | 3  | 551.46 | 183.819 | 18.99   | 0.000   |
| A                    | 1  | 219.90 | 219.899 | 22.71   | 0.000   |
| B                    | 1  | 291.19 | 291.186 | 30.08   | 0.000   |
| C                    | 1  | 40.37  | 40.370  | 4.17    | 0.055   |
| 2-Way Interactions   | 1  | 14.16  | 14.157  | 1.46    | 0.241   |
| A*B                  | 1  | 14.16  | 14.157  | 1.46    | 0.241   |
| Error                | 19 | 183.94 | 9.681   |         |         |
| Lack-of-Fit          | 3  | 15.70  | 5.233   | 0.50    | 0.689   |
| Pure Error           | 16 | 168.25 | 10.515  |         |         |
| Total                | 23 | 749.56 |         |         |         |

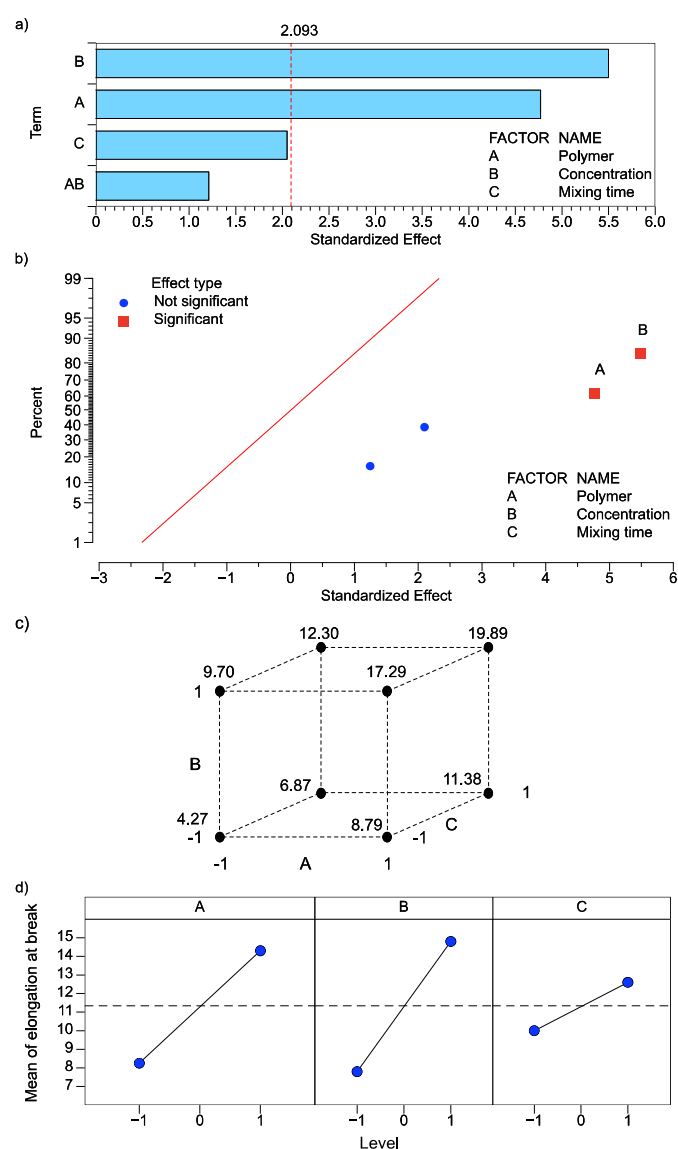

**Figure S1.** (a) Pareto chart of standardized effects for  $\alpha = 0.05$ , (b) Normal chart, (c) Cube plot, and (d) Main effects of elongation.

**Table S3.** Conditions for formulating polymer blends with elongation capacity.

| Factor | Name          | Level     | Identification   |
|--------|---------------|-----------|------------------|
| A      | Polymer       | (+1)      | EVA              |
| B      | Concentration | (+1)      | 30%              |
| C      | Mixing time   | (-1),(+1) | 5 min and 15 min |

**Table S4.** Factorial regression for stiff polymer blends.

| Analysis of Variance |    |          |          |         |         |
|----------------------|----|----------|----------|---------|---------|
| Source               | DF | Adj SS   | Adj MS   | Valor F | Valor P |
| Model                | 7  | 0.126396 | 0.018057 | 3.30    | 0.023   |
| Linear               | 3  | 0.084155 | 0.028052 | 5.03    | 0.012   |
| A                    | 1  | 0.024067 | 0.024067 | 5.26    | 0.036   |
| B                    | 1  | 0.000088 | 0.000088 | 0.01    | 0.934   |
| C                    | 1  | 0.060000 | 0.060000 | 9.81    | 0.006   |
| 2-Way Interactions   | 3  | 0.011568 | 0.003856 | 0.46    | 0.712   |

|                    |    |          |          |      |       |
|--------------------|----|----------|----------|------|-------|
| A*B                | 1  | 0.000400 | 0.000400 | 0.01 | 0.922 |
| A*C                | 1  | 0.003174 | 0.003174 | 0.35 | 0.560 |
| B*C                | 1  | 0.007993 | 0.007993 | 1.02 | 0.326 |
| 3-Way Interactions | 1  | 0.030674 | 0.030674 | 6.61 | 0.021 |
| A*B*C              | 1  | 0.030674 | 0.03674  | 6.61 | 0.021 |
| Error              | 16 | 0.094434 | 0.005902 |      |       |
| Total              | 23 | 0.220830 |          |      |       |

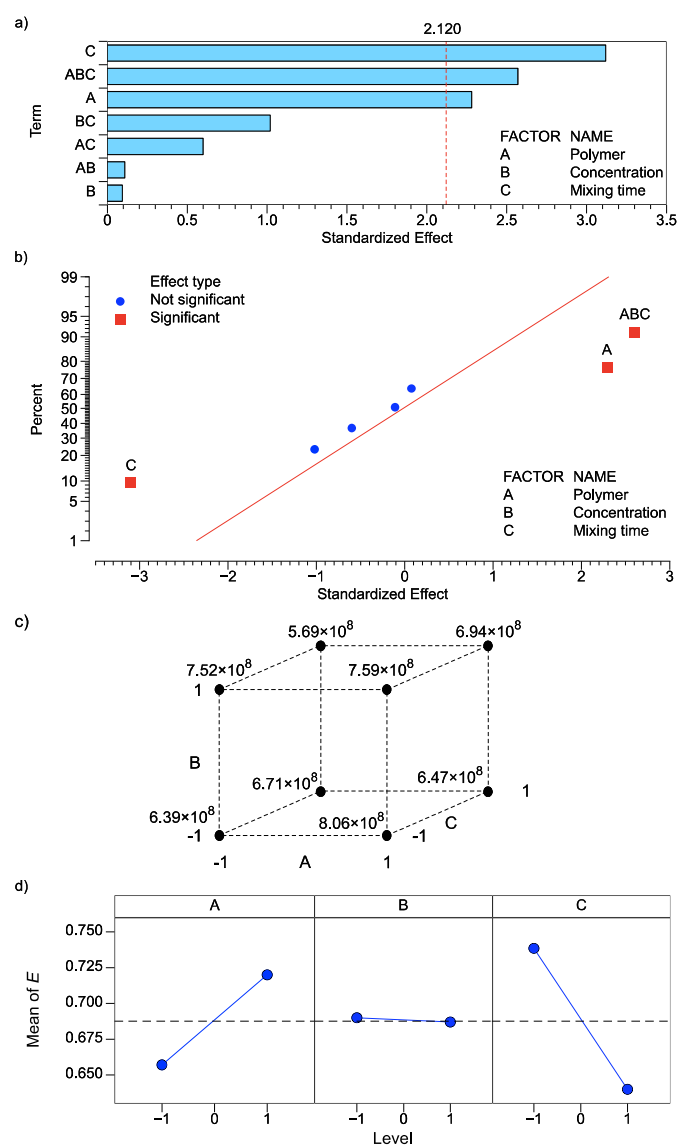

**Figure S2.** (a) Pareto chart of standardized effects (response elastic modulus), (b) Normal chart, (c) Cube plot, and (d) Main effects for elastic modulus.

**Table S5.** Conditions of high stiffness blends are considered to continue with characterization.

| Factor | Name          | Level     | Identification |
|--------|---------------|-----------|----------------|
| A      | Polymer       | (+1)      | SMMA           |
| B      | Concentration | (-1),(+1) | 1% and 30%     |
| C      | Mixing time   | (-1)      | 5 min          |

**Table S6.** Mechanical and physicochemical properties of neat PLA/5 min, neat PLA/15 min, binary and ternary blends.

| Sample          | $\epsilon_b$ / % | $E$ / GPa       | $E'$ / GPa<br>Glassy <sup>1</sup> | $E'$ / GPa<br>Rubbery <sup>1</sup> | $T_{g1}$ / °C | $T_{g2}$ / °C | $\tan \delta$ |
|-----------------|------------------|-----------------|-----------------------------------|------------------------------------|---------------|---------------|---------------|
| EPS 1           | $21.24 \pm 5.1$  | $0.63 \pm 0.04$ | 1.50                              | 0.003                              |               | 51.2          | 1.37          |
| EPS 2           | $43.78 \pm 6.7$  | $0.63 \pm 0.06$ | 0.79                              | 0.002                              |               | 52.5          | 1.65          |
| EPS 3           | $67.13 \pm 9.4$  | $0.57 \pm 0.03$ | 1.47                              | 0.002                              |               | 51.6          | 1.47          |
| 70PLA-30EVA/t5  | $18.1 \pm 4.8$   | $0.29 \pm 0.01$ | 1.28                              | 0.001                              | −32.52        | 54.82         | 1.6           |
| 70PLA-30EVA/t15 | $19.0 \pm 8.5$   | $0.43 \pm 0.03$ | 1.62                              | 0.0011                             | −36.41        | 55.07         | 1.56          |
| 99PLA-1SMMA/t5  | -                | $0.81 \pm 0.13$ | 3.01                              | 0.0025                             |               | 57.4          | 2.1           |
| 99PLA-1SMMA/t15 | -                | $0.65 \pm 0.05$ | 3.25                              | 0.0027                             |               | 58.2          | 2.1           |
| Neat PLA/t5     | $5.30 \pm 1.3$   | $0.50 \pm 0.09$ | 2.85                              | 0.002                              |               | 56.3          | 3.05          |
| Neat PLA/t15    | $4.70 \pm 0.1$   | $0.62 \pm 0.04$ | 3.01                              | 0.002                              |               | 51.6          | 2.69          |

<sup>1</sup> Measurement made at 37 °C and 80 °C for the glassy and rubbery zone, respectively.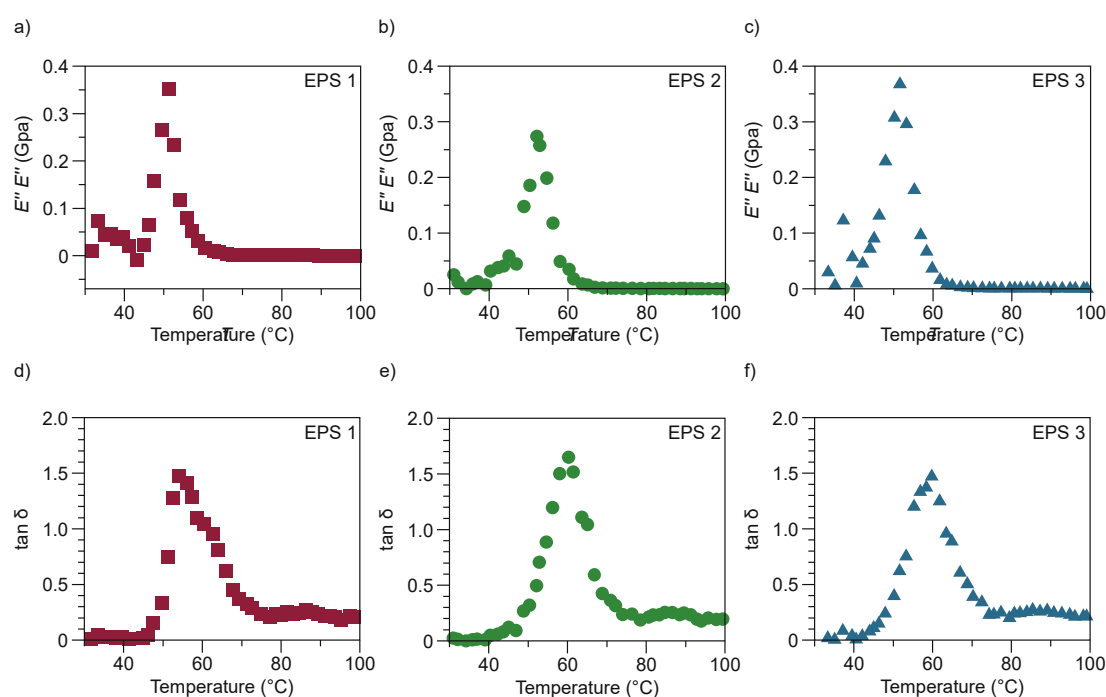**Figure S3.** Loss modulus of ternary blends. (a) EPS 1, (b) EPS 2, (c) EPS 3; and  $\tan \delta$  of ternary blends, (d) EPS 1, (e) EPS 2, (f) EPS 3.**Table S7.** TGA parameters ( $T_{onset}$ ,  $T_{max}$ , and  $T_i$ ) in EVA, PLA, SMMA, and EPS ternary blends.

| Sample          | First Degradation Step ( $T_{d1}$ ) |                |            | Second Degradation Step ( $T_{d2}$ ) |                |            | Third Degradation Step ( $T_{d3}$ ) |                |            |
|-----------------|-------------------------------------|----------------|------------|--------------------------------------|----------------|------------|-------------------------------------|----------------|------------|
|                 | $T_{onset}$ / °C                    | $T_{max}$ / °C | $T_i$ / °C | $T_{onset}$ / °C                     | $T_{max}$ / °C | $T_i$ / °C | $T_{onset}$ / °C                    | $T_{max}$ / °C | $T_i$ / °C |
| neat PLA / t15  | 223                                 | 298            | 253        | -                                    | -              | -          | -                                   | -              | -          |
| neat EVA / t15  | 292                                 | 344            | 388        | 423                                  | 452            | 489        | 489                                 | 503            | 527        |
| neat SMMA / t15 | 261                                 | 402            | 439        | -                                    | -              | -          | -                                   | -              | -          |
| EPS 1           | 240                                 | 328            | 387        | 399                                  | 461            | 480        | 480                                 | 491            | 529        |
| EPS 2           | 260                                 | 326            | 383        | 408                                  | 443            | 484        | 484                                 | 490            | 519        |
| EPS 3           | 250                                 | 330            | 388        | 410                                  | 438            | 477        | 477                                 | 490            | 529        |
